# Supplementary material for: Impact of post-alignment processing in variant discovery from whole exome data
Source: Springer Nature journal article supplement (doi:10.1186/s12859-016-1279-z), 2016-10-03
Supplement: 12859_2016_1279_MOESM2_ESM.pdf [file 12859_2016_1279_MOESM2_ESM.pdf]

## Additional file 2

**Table S1** Five public exome-seq data in NA12878

| Sequence ID            | Name         | Approx. coverage | Length (bp) | Platform   | Capture kit |
|------------------------|--------------|------------------|-------------|------------|-------------|
| NA12878-NGv3-LAB1360-A | NA12878-NGv3 | 66               | 100         | HiSeq 2000 | Roche       |
| SRR1611181             | SRR1611181   | 90               | 100         | HiSeq 2000 | Roche       |
| FC1_NA12878_01         | NA12878_01   | 100              | 150         | HiSeq 2500 | Illumina    |
| FC1_NA12878_04         | NA12878_04   | 100              | 150         | HiSeq 2500 | Illumina    |
| SRR1919605             | SRR1919605   | 100              | 76          | HiSeq 4000 | Illumina    |

The 76-bp and 150-bp reads are available at <https://basespace.illumina.com/>.  
Capture kit: Roche, SeqCap EZ Human Exome kit v3.0 (with 64 Mb targets);  
Illumina, Nextera Rapid Capture Exome kit (with 37 Mb targets).

**Table S2** Change of SNP calling sensitivity and precision rate after local realignment

| Metrics        | Change (%) | No. cases | % cases |
|----------------|------------|-----------|---------|
| Sensitivity    | -0.1       | 4         | 1.43    |
| Sensitivity    | 0          | 242       | 86.43   |
| Sensitivity    | 0.1        | 33        | 11.79   |
| Sensitivity    | 0.2        | 1         | 0.36    |
| Precision rate | -0.1       | 1         | 0.36    |
| Precision rate | 0          | 224       | 80      |
| Precision rate | 0.1        | 44        | 15.71   |
| Precision rate | 0.2        | 10        | 3.57    |
| Precision rate | 0.3        | 1         | 0.36    |

See Table 1 for details.
